# Supplementary material for: Taking the pulse of nature – How robotics and sensors assist in lake and reservoir management
Source: Copernicus journal article supplement (doi:10.5194/egusphere-2024-2261), 2024-08-07
Supplement: Supplementary file [file egusphere-2024-2261-AC1-supplement.pdf]

## **Additional replies to the referees comments**

We thank both referees for their critical assessment of our manuscript and are happy to reply to the additional questions raised. The arguments raised by the referees are repeated here with bullet points, and our related replies in italics to allow for a rapid overview. Given that this is the first time that we submit to “Geoscientific Instrumentation Methods and Data Systems”, we hope not to overlook any formal requirements related to our communications. Kindly make us aware, if other or additional steps are to be taken.

- Clarify the comparison between MARP-FG and other robotic platforms in environmental monitoring to emphasize unique contributions.

*In comparison with other robotic platforms, MARP-FG seems to be the most versatile with the ability to very quickly exchange payloads, lightweight and easy to transport. MARP-FG floater construction is the only one that generates calm water conditions between the floaters, allowing for high-quality gas exchange measurements and gas sampling.*

- Provide more quantitative results on data quality improvements achieved with MARP-FG (e.g., stability metrics in greenhouse gas measurements compared to manual methods).

*The biggest advantage lies in the ability to perform measurements during nighttime and under adverse weather conditions, such as strong winds and rainstorms. Both are next to impossible without the platform.*

*A PhD dissertation by Eric Roeder analyzed (among other issues) how gas sampling affects the in situ CO<sub>2</sub> measurement. Sudden air pressure peak values occur with manual gas sampling, but not with automatic gas sampling. No noticeable or quantifiable influence were detected on the in situ CO<sub>2</sub> measurement. We can deliver related material if needed.*

*Manual sampling creates artificial turbulence that enhances gas exchange under calm water conditions. In Brazil, turbulence was no relevant factor due to the high emission rates, but in general this is important for GHG measurements: The less artificial turbulence, the better. Corresponding literature is available upon request.*

- Discuss any potential environmental impacts of the platform itself, such as energy use and interactions with local wildlife. How does MARP-FG minimize its impact during deployment in sensitive ecosystems?

*The platform seems not to disturb wildlife at all. We observe e.g., curious freshwater dolphins checking the platform out then losing interest and leaving again. We never observed waterfowl being interested in the platform. The platform is small and light, we have never observed any adverse effect.*

*There are no emission sources coming from the platform, given its electrical thrusters. We do not understand the question “such as energy use”.*

*Deployment of a small robotic platform avoids sending humans out with their smell, noises, and movements. There is much less water turbulence and no larger boat which may also mechanically disturb floating plant communities.*

- Expand details on MARP-FG's modular adaptability in different missions, as this is a core strength.

*Within a few minutes, any payload can be detached and another payload mounted and activated. Quick release knobs hold any payload frame tight on the platform frame. The only steps needed are the detachment of cables and other connectors between platform and payload, then release the knobs and take the complete payload off. Place another payload on, tighten the knobs and attach all necessary cables and/or connectors. Ready.*

- Given the energy-intensive tasks (e.g., 3D sonar mapping), detailing power efficiency strategies, battery hot-swapping procedures, or even potential renewable energy options (such as modular solar panels) could enhance the platform's operational range and environmental sustainability.

*The battery management is programmed for maximum efficiency, yet uses standard (off the shelf) components. The batteries are standard ones from cordless power tools, easily available almost everywhere. Any battery can be hot-swapped.*

*Solar panels could be mounted. Their role would be to recharge the batteries. We did not need that option which would add to wind resistance, etc., as 8 hrs operating time plus hot swapping were fully sufficient and recharging batteries on*

*For the 3D mapping task, we now use another set of floaters, which are considerably longer (almost 2 meters) and can carry more weight (downside: Not that easy to transport when it comes to air transport). That set-up is powered by Minn Kota engines and much larger batteries (automobile batteries). However, the conventional MARP-FG setup, as described in the article can perform the task, too, albeit with lower speed and less hours.*

- You could provide a more discussion on MARP-FG's limitations in handling extreme environments. For instance, specifying the upper limits for humidity, temperature, or water turbulence where MARP-FG can still function optimally could help clarify its resilience.

*There are no upper limits for environmental humidity or temperature, water wave heights up to  $\pm 40$  cm and wind speeds to 7 meters per second still allow working the platform.*

- To improve data consistency across different mission types, establishing standardized data formats and describing these in the paper would aid researchers in efficiently managing and analyzing data from different payloads.

*The status data of the robot is being recorded in the ArduPilot log format (<https://ardupilot.org/copter/docs/common-logs.html>). This format is supported by a variety of tools for analysis, debugging, and replay, making it well-suited as a standardized exchange format for use among researchers. In contrast, the format for individual gas exchange measurements and related contextual information is less standardized. These data are stored in CSV files, with the sensor characteristics documented in the corresponding publications.*

- Some of the hyperlinks in the paper are not functional.

*There are nine (9) hotlink in the manuscript, see below. We checked everyone of them and they all worked well. We will check it again when the proofs come in, since sometimes, glitches may occur with typesetting or file transformation.*

<https://ardupilot.org/planner/>:

[https://sebastianzug.github.io/RoBiMo\\_Trop\\_DataSet/](https://sebastianzug.github.io/RoBiMo_Trop_DataSet/)

<https://ardupilot.org/copter/docs/logmessages.html>

<https://ardupilot.org/copter/docs/common-downloading-and-analyzing-data-logs-in-mission-planner.html#common-downloading-and-analyzing-data-logs-in-mission-planner>

<https://gitlab.rrz.uni-hamburg.de/bay2789/bslogfiles/-/tree/master>

[https://sebastianzug.github.io/RoBiMo\\_Trop\\_DataSet/html/balbina.html](https://sebastianzug.github.io/RoBiMo_Trop_DataSet/html/balbina.html)

[https://sebastianzug.github.io/RoBiMo\\_Trop\\_DataSet/html/interactive\\_table.html](https://sebastianzug.github.io/RoBiMo_Trop_DataSet/html/interactive_table.html)

<https://github.com/ntract/papermill>

<https://www.pangaea.de/>

- On page 9, line 367, there's an incorrect reference to a figure. The text is explaining Figure 6, but it mistakenly says Figure 5.

*You are perfectly correct, this is a mistake and has been corrected.*

### Questions:

- Why was there no detailed statistical analysis or interpretation of the greenhouse gas flux data presented, especially given the claimed advantages of continuous data collection by the robotic platform?

*This was expressed as overloading the paper by the editors. We are preparing another paper, solely dedicated to the respiration data. Much of the data will already appear in a PhD dissertation by Eric Roeder from TU Bergakademie Freiberg to be defended shortly. At the same time, an upload of the original data with all metadata in Pangaea has been done; publication is pending.*

- Given that the paper focuses on the reliability and accuracy of robotic deployment, what additional analyses could be conducted to demonstrate the environmental implications of the collected measurements, such as correlations between gas fluxes and environmental conditions?

*One aspect has been addressed, namely wind speed. Other conditions include (heavy) precipitation and mixis.*

- What specific limitations or uncertainties exist in the gathered greenhouse gas data, and how could future studies leverage data analysis techniques to provide clearer environmental or biogeochemical conclusions?

*So far, we have gained greenhouse gas data in five campaigns in both dry and rainy seasons in the Amazon basin. However, only the last two campaigns allowed for nighttime determinations. It would be highly desirable to dedicate more time to run more extensive experiments and data acquisition. Independent of the Amazon basin, the platform has been used successfully on various lakes and reservoirs in Central Europe.*

### Additional questions:

- How do you plan to address limitations in MARP-FG's error communication and mitigation strategies for nighttime and long-distance missions?

*In areas with mobile phone network coverage, data transmission occurs independently of the telemetry radio connection. This capability also enables the transmission of video*

*streams from the MARP-FG, facilitating detailed observation of platform operations, particularly during the development and testing of new functionalities. In the absence of this redundant communication channel, we realized extensive testing campaigns and developed a robust software system to ensure the robot's ability to operate autonomously. This design approach minimizes the reliance of the MARP-FG robot on live radio communication.*

- How does MARP-FG's design account for climate-induced changes, such as fluctuating water levels or extreme weather patterns? Have stress tests been conducted to ensure performance in these variable conditions?

*See answer above (You could provide a more discussion on MARP-FG's limitations in handling extreme environments).*

- How is long-term data storage handled, especially for multi-season campaigns in remote areas? What strategies are in place to ensure data continuity and accessibility over extended periods?

*A subset of the robot's filtered status data is freely available as a downloadable dataset on GitHub. The link is referenced in the paper. The dataset can be visualized and analyzed online through an interactive dashboard designed for interested researchers. Additionally, the visualization includes a note indicating that the complete raw dataset can be provided upon request.*

- Could multiple MARP-FG platforms work together in coordinated tasks to cover larger areas more efficiently? If so, what communication protocols would be necessary to facilitate this collaboration?

*Given the vastness of aquatic environments, the distribution of observed phenomena, and the dynamic nature of environmental conditions, deploying a swarm of MARP-FG systems could enable parallelized operations and facilitate synchronous measurements. For this approach, reliable communication between the robots would be essential to coordinate and trigger measurement processes effectively. A purely time-controlled execution of a pre-calculated plan would be inadequate due to the unpredictable jitter of travel times between measurement locations. Consequently, a mobile network infrastructure.*
